# Supplementary material for: Optimized procedure for the determination of alkylamines in airborne particulate matter of anthropized areas
Source: Copernicus journal article supplement (doi:10.5194/ar-1-29-2023), 2023-11-17
Supplement: Supplementary file 1 [file ar-1-29-2023-supplement.pdf]

Supplement of Aerosol Research, 1, 29–38, 2023  
<https://doi.org/10.5194/ar-1-29-2023-supplement>  
© Author(s) 2023. CC BY 4.0 License.

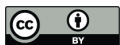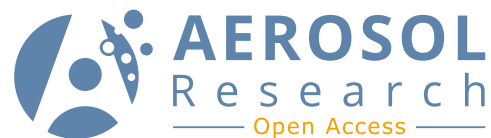

*Supplement of*

## **Optimized procedure for the determination of alkylamines in airborne particulate matter of anthropized areas**

**Davide Spolaor et al.**

*Correspondence to:* Andrea Tapparo ([andrea.tapparo@unipd.it](mailto:andrea.tapparo@unipd.it))

The copyright of individual parts of the supplement might differ from the article licence.

**Table S1** Data acquired during the sampling campaign.

|            |            | PM10              | NOx               | NO                | NO2               | NH3 | H2S               | Temperature | Relative humidity |
|------------|------------|-------------------|-------------------|-------------------|-------------------|-----|-------------------|-------------|-------------------|
|            |            | µg/m <sup>3</sup> | µg/m <sup>3</sup> | µg/m <sup>3</sup> | µg/m <sup>3</sup> | ppb | µg/m <sup>3</sup> | °C          | %                 |
| 18/09/2020 | Montebello | 31,9              | 55                | 16                | 31                | 9   | 23                | 24          | 52                |
| 19/09/2020 |            | 23,5              | 24                | 5                 | 17                | 10  | 14                | 21          | 54                |
| 20/09/2020 |            | 22,2              | 17                | 2                 | 15                | 10  | 14                | 21          | 59                |
| 21/09/2020 |            | 28,1              | 48                | 13                | 29                | 13  | 16                | 23          | 58                |
| 22/09/2020 |            | 22,7              | 46                | 13                | 26                | 12  | 9                 | 20          | 86                |
| 23/09/2020 |            | 20,3              | 41                | 14                | 20                | 4   | 21                | 20          | 80                |
| 24/09/2020 |            | 23,8              | 46                | 14                | 24                | 0   | 9                 | 20          | 82                |
| 25/09/2020 |            | 14,7              | n/a               | n/a               | n/a               | n/a | 15                | 19          | 76                |
| 26/09/2020 |            | 13,3              | 19                | 4                 | 13                | 1   | 17                | 16          | 57                |
| 28/09/2020 |            | 21,8              | 66                | 25                | 27                | 2   | 11                | 14          | 75                |
| 29/09/2020 |            | 31,3              | 69                | 27                | 28                | 5   | 19                | 16          | 69                |
| 30/09/2020 |            | 39,9              | 53                | 15                | 29                | 13  | 15                | 17          | 71                |
| 01/10/2020 |            | 49,2              | 57                | 18                | 29                | 14  | 9                 | 18          | 73                |
| 02/10/2020 |            | 24,5              | 49                | 15                | 26                | 13  | 7                 | 17          | 95                |
| 03/10/2020 |            | 12,4              | 16                | 3                 | 11                | 8   | 20                | 18          | 81                |
| 04/10/2020 | 9,9        | 15                | 3                 | 11                | 3                 | 16  | 15                | 81          |                   |
| 05/10/2020 |            | 20,7              | 57                | 21                | 25                | 5   | 18                | 16          | 79                |
| 06/10/2020 |            | 23,2              | 74                | 32                | 25                | 5   | 34                | 16          | 74                |
| 07/10/2020 |            | 26,1              | n/a               | n/a               | n/a               | n/a | 16                | 17          | 75                |
| 14/10/2020 | Montorso   | 17,2              | 75                | 30                | 29                | 6   | 7                 | 10          | 72                |
| 15/10/2020 |            | 16,7              | 56                | 11                | 39                | 7   | 12                | 11          | 94                |
| 16/10/2020 |            | 20                | 52                | 13                | 32                | 7   | 8                 | 12          | 82                |
| 17/10/2020 |            | 55,1              | 40                | 11                | 23                | 5   | 8                 | 11          | 88                |
| 18/10/2020 |            | 86,3              | 16                | 3                 | 12                | 1   | 6                 | 11          | 88                |
| 19/10/2020 |            | 73,3              | 35                | 11                | 19                | 1   | 6                 | 12          | 86                |
| 20/10/2020 |            | 63,2              | 35                | 11                | 18                | 1   | 7                 | 12          | 85                |
| 21/10/2020 |            | 73,6              | 40                | 12                | 21                | 4   | 7                 | 12          | 88                |
| 22/10/2020 |            | 80,3              | 57                | 21                | 24                | 6   | 10                | 11          | 93                |
| 23/10/2020 |            | 66,1              | 39                | 10                | 24                | 5   | 7                 | 13          | 97                |
| 24/10/2020 |            | 47,5              | 26                | 6                 | 17                | 4   | 7                 | 14          | 99                |
| 25/10/2020 |            | 16,6              | 17                | 3                 | 12                | 4   | 5                 | 15          | 84                |
| 26/10/2020 |            | 31,9              | 35                | 8                 | 23                | 8   | 8                 | 14          | 96                |
| 27/10/2020 |            | 16,4              | 25                | 5                 | 17                | 3   | 7                 | 12          | 94                |
| 28/10/2020 |            | 25,8              | 49                | 19                | 20                | 2   | 9                 | 11          | 89                |

|            |          |      |    |    |    |    |     |    |     |
|------------|----------|------|----|----|----|----|-----|----|-----|
| 30/10/2020 | Trissino | 48,6 | 48 | 16 | 23 | 5  | 37  | 12 | 90  |
| 31/10/2020 |          | 52,9 | 37 | 11 | 21 | 3  | 42  | 11 | 91  |
| 01/11/2020 |          | 60,9 | 39 | 14 | 17 | 3  | 47  | 10 | 100 |
| 02/11/2020 |          | 64,9 | 25 | 4  | 18 | 4  | 5   | 12 | 93  |
| 03/11/2020 |          | 50,5 | 24 | 4  | 17 | 4  | 42  | 14 | 82  |
| 05/11/2020 |          | n/a  | 35 | 9  | 22 | 4  | 147 | 15 | 80  |
| 06/11/2020 |          | 27,3 | 41 | 11 | 24 | 3  | 113 | 13 | 77  |
| 07/11/2020 |          | 31,5 | 33 | 8  | 22 | 2  | 88  | 12 | 78  |
| 08/11/2020 |          | 28,9 | 27 | 6  | 19 | 3  | 102 | 11 | 84  |
| 09/11/2020 |          | 39,9 | 55 | 18 | 27 | 3  | 52  | 11 | 85  |
| 10/11/2020 |          | 37,1 | 53 | 15 | 31 | 4  | 127 | 11 | 81  |
| 11/11/2020 |          | 26,8 | 38 | 8  | 26 | 4  | 104 | 10 | 72  |
| 12/11/2020 |          | 47,3 | 55 | 15 | 31 | 4  | 58  | 9  | 79  |
| 13/11/2020 |          | 65,1 | 79 | 31 | 32 | 6  | 50  | 8  | 90  |
| 14/11/2020 |          | 51,2 | 33 | 9  | 20 | 5  | 36  | 10 | 88  |
| 15/11/2020 |          | 51,5 | 24 | 5  | 16 | 3  | 31  | 9  | 86  |
| 16/11/2020 |          | 47,6 | 33 | 7  | 22 | 5  | 32  | 10 | 98  |
| 17/11/2020 |          | 23,4 | 54 | 17 | 28 | 3  | 79  | 10 | 86  |
| 18/11/2020 | 39,2     | 79   | 33 | 29 | 3  | 73 | 8   | 89 |     |

**Table S2** Concentrations (determined by IC) of the principal cations and anions contained in PM10 samples. Concentrations below LOD (sulfate) were taken as they are (without empirical correction) in the statistical analysis.

|       |  | Sodium            | Ammonium          | Potassium         | Magnesium         | Calcium           | Chloride          | Nitrate           | Sulfate           |
|-------|--|-------------------|-------------------|-------------------|-------------------|-------------------|-------------------|-------------------|-------------------|
|       |  | µg/m <sup>3</sup> |
| LOD   |  | 0.04              | 0.07              | 0.04              | 0.03              | 0.06              | 0.28              | 0.20              | 0.91              |
| 18/09 |  | 0.80              | 0.93              | 0.14              | 0.10              | 1.03              | 0.36              | 1.62              | 2.75              |
| 19/09 |  | 0.84              | 0.70              | 0.14              | 0.09              | 0.73              | 0.34              | 1.51              | 2.04              |
| 20/09 |  | 0.85              | 0.95              | 0.14              | 0.09              | 0.57              | 0.32              | 1.96              | 2.17              |
| 21/09 |  | 0.86              | 0.85              | 0.15              | 0.10              | 0.95              | 0.34              | 1.93              | 2.39              |
| 22/09 |  | 0.67              | 1.01              | 0.16              | 0.10              | 0.60              | 0.35              | 2.93              | 1.97              |
| 23/09 |  | 0.59              | 0.67              | 0.10              | 0.07              | 0.75              | 0.31              | 2.26              | 1.82              |
| 24/09 |  | 0.61              | 1.59              | 0.18              | 0.10              | 0.68              | 0.32              | 5.88              | 1.81              |
| 25/09 |  | 0.73              | 0.36              | 0.12              | 0.08              | 0.47              | 0.37              | 1.64              | 1.27              |
| 26/09 |  | 0.65              | 0.07              | 0.12              | 0.06              | 0.26              | 0.37              | 1.02              | 0.74              |
| 28/09 |  | 0.64              | 0.20              | 0.06              | 0.07              | 0.53              | 0.32              | 1.45              | 0.81              |
| 29/09 |  | 0.76              | 1.16              | 0.16              | 0.08              | 0.62              | 0.33              | 5.01              | 1.00              |
| 30/09 |  | 0.74              | 3.49              | 0.30              | 0.09              | 0.78              | 0.37              | 12.68             | 1.48              |
| 01/10 |  | 0.79              | 4.53              | 0.37              | 0.11              | 0.91              | 0.40              | 16.97             | 1.96              |
| 02/10 |  | 0.87              | 2.37              | 0.24              | 0.11              | 0.45              | 0.52              | 7.48              | 1.75              |
| 03/10 |  | 1.61              | 0.13              | 0.10              | 0.16              | 0.33              | 0.75              | 1.89              | 1.62              |
| 04/10 |  | 0.93              | 0.22              | 0.07              | 0.08              | 0.22              | 0.50              | 1.54              | 0.90              |
| 05/10 |  | 0.87              | 0.20              | 0.07              | 0.09              | 0.52              | 0.49              | 1.42              | 1.10              |
| 06/10 |  | 1.14              | 0.46              | 0.14              | 0.13              | 0.64              | 0.66              | 2.76              | 1.28              |
| 07/10 |  | 1.03              | 0.55              | 0.13              | 0.12              | 0.59              | 0.39              | 3.15              | 1.25              |
| 14/10 |  | 0.63              | 0.93              | 0.21              | 0.07              | 0.50              | 0.29              | 3.90              | 0.83              |
| 15/10 |  | 0.66              | 0.31              | 0.09              | 0.05              | 0.21              | 0.31              | 1.63              | 0.70              |
| 16/10 |  | 0.67              | 0.49              | 0.18              | 0.05              | 0.26              | 0.34              | 1.95              | 0.83              |
| 17/10 |  | 0.62              | 2.94              | 0.24              | 0.07              | 0.35              | 0.33              | 8.83              | 1.17              |
| 18/10 |  | 1.12              | 3.52              | 0.41              | 0.35              | 2.13              | 1.40              | 11.85             | 2.44              |
| 19/10 |  | 1.02              | 4.75              | 0.41              | 0.28              | 2.04              | 1.26              | 15.07             | 2.71              |
| 20/10 |  | 0.68              | 7.21              | 0.25              | 0.09              | 0.67              | 0.41              | 21.92             | 2.13              |
| 21/10 |  | 0.67              | 8.30              | 0.30              | 0.10              | 0.68              | 0.50              | 25.07             | 2.29              |
| 22/10 |  | 0.70              | 10.53             | 0.32              | 0.11              | 0.65              | 0.58              | 31.52             | 3.05              |
| 23/10 |  | 0.65              | 8.50              | 0.24              | 0.08              | 0.46              | 0.48              | 24.53             | 2.96              |
| 24/10 |  | 0.62              | 5.60              | 0.24              | 0.05              | 0.26              | 0.48              | 14.94             | 2.21              |
| 25/10 |  | 0.74              | 1.47              | 0.21              | 0.05              | 0.23              | 0.36              | 4.72              | 1.04              |

|       |          |      |      |      |      |      |      |       |      |
|-------|----------|------|------|------|------|------|------|-------|------|
| 26/10 |          | 0.86 | 3.20 | 0.22 | 0.08 | 0.30 | 0.52 | 8.65  | 1.63 |
| 27/10 |          | 0.66 | 0.34 | 0.18 | 0.05 | 0.23 | 0.37 | 1.47  | 0.75 |
| 28/10 |          | 0.73 | 0.81 | 0.29 | 0.07 | 0.39 | 0.42 | 3.22  | 0.92 |
| 30/10 | Trissino | 0.59 | 3.45 | 0.39 | 0.10 | 0.63 | 0.40 | 12.89 | 1.19 |
| 31/10 |          | 0.61 | 4.13 | 0.56 | 0.08 | 0.42 | 0.46 | 14.68 | 1.56 |
| 01/11 |          | 0.61 | 4.65 | 0.75 | 0.05 | 0.23 | 0.50 | 14.86 | 2.09 |
| 02/11 |          | 0.62 | 4.25 | 0.68 | 0.07 | 0.34 | 0.45 | 13.45 | 2.05 |
| 03/11 |          | 0.68 | 4.22 | 0.56 | 0.09 | 0.47 | 0.35 | 14.30 | 2.07 |
| 05/11 |          | 1.56 | 0.23 | 0.61 | 0.55 | 3.85 | 2.60 | 2.83  | 3.46 |
| 06/11 |          | 0.70 | 1.13 | 0.30 | 0.09 | 0.76 | 0.32 | 4.36  | 1.27 |
| 07/11 |          | 0.70 | 1.14 | 0.31 | 0.07 | 0.42 | 0.30 | 4.16  | 1.11 |
| 08/11 |          | 0.70 | 2.02 | 0.43 | 0.06 | 0.30 | 0.32 | 6.19  | 1.41 |
| 09/11 |          | 0.75 | 2.76 | 0.46 | 0.10 | 0.78 | 0.36 | 9.83  | 1.44 |
| 10/11 |          | 0.80 | 2.08 | 0.43 | 0.10 | 1.09 | 0.33 | 7.54  | 1.52 |
| 11/11 |          | 0.77 | 1.56 | 0.35 | 0.08 | 0.79 | 0.31 | 4.34  | 2.23 |
| 12/11 |          | 0.71 | 3.05 | 0.56 | 0.09 | 1.20 | 0.42 | 10.03 | 2.57 |
| 13/11 |          | 0.75 | 5.19 | 0.86 | 0.11 | 1.03 | 0.49 | 18.93 | 2.69 |
| 14/11 |          | 0.62 | 4.43 | 0.73 | 0.11 | 0.58 | 0.39 | 15.25 | 2.23 |
| 15/11 |          | 0.80 | 5.28 | 0.89 | 0.08 | 0.45 | 0.43 | 17.81 | 2.32 |
| 16/11 |          | 0.77 | 4.46 | 0.71 | 0.08 | 0.37 | 0.37 | 14.82 | 1.96 |
| 17/11 |          | 0.83 | 0.40 | 0.24 | 0.09 | 0.61 | 0.43 | 2.06  | 0.89 |
| 18/11 | 0.75     | 1.49 | 0.50 | 0.10 | 0.79 | 0.47 | 5.56 | 1.33  |      |

**Table S3** Measured concentration in PM10 samples of organic and elemental carbon.

|            |            | Organic carbon           | Elemental carbon         | Total carbon             |       |
|------------|------------|--------------------------|--------------------------|--------------------------|-------|
|            |            | $\mu\text{g}/\text{m}^3$ | $\mu\text{g}/\text{m}^3$ | $\mu\text{g}/\text{m}^3$ |       |
| 18/09/2020 | Montebello | 6.15                     | 1.87                     | 8.01                     |       |
| 19/09/2020 |            | 5.37                     | 1.15                     | 6.52                     |       |
| 20/09/2020 |            | 5.08                     | 0.91                     | 6.00                     |       |
| 21/09/2020 |            | 5.81                     | 1.68                     | 7.49                     |       |
| 22/09/2020 |            | 4.93                     | 1.48                     | 6.42                     |       |
| 23/09/2020 |            | 4.58                     | 1.38                     | 5.96                     |       |
| 24/09/2020 |            | 4.89                     | 1.55                     | 6.44                     |       |
| 25/09/2020 |            | 4.97                     | 1.21                     | 6.19                     |       |
| 26/09/2020 |            | 5.74                     | 0.84                     | 6.58                     |       |
| 28/09/2020 |            | 3.81                     | 1.64                     | 5.45                     |       |
| 29/09/2020 |            | 4.96                     | 1.56                     | 6.51                     |       |
| 30/09/2020 |            | 5.74                     | 1.54                     | 7.28                     |       |
| 01/10/2020 |            | 6.34                     | 1.58                     | 7.91                     |       |
| 02/10/2020 |            | 4.51                     | 1.49                     | 6.00                     |       |
| 03/10/2020 |            | 2.98                     | 0.52                     | 3.50                     |       |
| 04/10/2020 |            | 2.67                     | 0.56                     | 3.23                     |       |
| 05/10/2020 |            | 3.40                     | 1.43                     | 4.83                     |       |
| 06/10/2020 |            | 4.97                     | 1.82                     | 6.79                     |       |
| 07/10/2020 |            | 4.65                     | 1.47                     | 6.12                     |       |
| 14/10/2020 |            | Montorso                 | 5.83                     | 1.32                     | 7.16  |
| 15/10/2020 | 3.54       |                          | 0.75                     | 4.29                     |       |
| 16/10/2020 | 3.90       |                          | 0.97                     | 4.87                     |       |
| 17/10/2020 | 6.07       |                          | 1.35                     | 7.42                     |       |
| 18/10/2020 | 16.03      |                          | 0.93                     | 16.95                    |       |
| 19/10/2020 | 11.78      |                          | 1.41                     | 13.19                    |       |
| 20/10/2020 | 8.10       |                          | 1.46                     | 9.56                     |       |
| 21/10/2020 | 10.82      |                          | 1.63                     | 12.44                    |       |
| 22/10/2020 | 10.85      |                          | 1.60                     | 12.45                    |       |
| 23/10/2020 | 9.01       |                          | 1.37                     | 10.39                    |       |
| 24/10/2020 | 7.26       |                          | 1.28                     | 8.54                     |       |
| 25/10/2020 | 4.18       |                          | 0.76                     | 4.94                     |       |
| 26/10/2020 | 6.33       |                          | 1.31                     | 7.65                     |       |
| 27/10/2020 | 4.76       |                          | 1.04                     | 5.81                     |       |
| 28/10/2020 | 7.00       |                          | 1.67                     | 8.67                     |       |
| 30/10/2020 | Trissino   |                          | 7.42                     | 1.59                     | 9.02  |
| 31/10/2020 |            |                          | 8.38                     | 1.63                     | 10.01 |
| 01/11/2020 |            |                          | 9.51                     | 1.61                     | 11.12 |
| 02/11/2020 |            | 8.91                     | 1.64                     | 10.55                    |       |
| 03/11/2020 |            | 8.78                     | 1.45                     | 10.23                    |       |
| 05/11/2020 |            | 21.85                    | 0.86                     | 22.71                    |       |
| 06/11/2020 |            | 6.66                     | 1.59                     | 8.25                     |       |
| 07/11/2020 |            | 6.86                     | 1.63                     | 8.50                     |       |
| 08/11/2020 | 6.79       | 1.38                     | 8.17                     |                          |       |

|            |          |       |      |       |
|------------|----------|-------|------|-------|
| 09/11/2020 | Trissino | 8.61  | 1.79 | 10.41 |
| 10/11/2020 |          | 8.23  | 1.88 | 10.12 |
| 11/11/2020 |          | 6.36  | 1.56 | 7.92  |
| 12/11/2020 |          | 9.17  | 1.78 | 10.95 |
| 13/11/2020 |          | 11.07 | 1.94 | 13.01 |
| 14/11/2020 |          | 9.34  | 1.64 | 10.98 |
| 15/11/2020 |          | 9.95  | 1.51 | 11.46 |
| 16/11/2020 |          | 8.39  | 1.48 | 9.86  |
| 17/11/2020 |          | 5.65  | 1.62 | 7.28  |
| 18/11/2020 |          | 8.51  | 2.28 | 10.79 |

**Table S4** Measured concentrations of the amines contained in PM10.

|       |            | MA (ng/m <sup>3</sup> ) |       | EA (ng/m <sup>3</sup> ) |       | DMA (ng/m <sup>3</sup> ) |        | PA (ng/m <sup>3</sup> ) |       | DEA (ng/m <sup>3</sup> ) |       |
|-------|------------|-------------------------|-------|-------------------------|-------|--------------------------|--------|-------------------------|-------|--------------------------|-------|
|       |            | Mean                    | SD    | Mean                    | SD    | Mean                     | SD     | Mean                    | SD    | Mean                     | SD    |
| 18/9  | Montebello | 6.15                    | 0.015 | 2.255                   | 0.000 | 12.647                   | 0.027  | 1.114                   | 0.000 | 4.579                    | 0.043 |
| 19/9  |            | 4.700                   | 0.086 | 2.175                   | 0.004 | 12.268                   | 0.001  | 0.803                   | 0.000 | 3.258                    | 0.032 |
| 20/9  |            | 6.254                   | 0.014 | 2.531                   | 0.014 | 12.587                   | 0.009  | 1.102                   | 0.000 | 3.572                    | 0.017 |
| 21/9  |            | 6.827                   | 0.013 | 2.819                   | 0.007 | 14.522                   | 0.015  | 1.206                   | 0.005 | 4.37                     | 0.12  |
| 22/9  |            | 10.283                  | 0.014 | 2.882                   | 0.007 | 16.570                   | 0.018  | 1.090                   | 0.006 | 5.255                    | 0.021 |
| 23/9  |            | 8.537                   | 0.012 | 2.918                   | 0.019 | 15.541                   | 0.061  | 1.051                   | 0.002 | 5.081                    | 0.022 |
| 24/9  |            | 13.677                  | 0.000 | 2.661                   | 0.008 | 20.035                   | 0.029  | 0.980                   | 0.018 | 6.065                    | 0.028 |
| 25/9  |            | 5.930                   | 0.056 | 1.444                   | 0.005 | 9.996                    | 0.027  | 0.448                   | 0.005 | 2.549                    | 0.003 |
| 26/9  |            | 0.924                   | 0.006 | 0.566                   | 0.000 | 5.449                    | 0.007  | 0.297                   | 0.004 | 1.350                    | 0.021 |
| 27/9  |            | 1.172                   | 0.019 | 0.490                   | 0.001 | 5.101                    | 0.004  | 0.398                   | 0.002 | 1.332                    | 0.002 |
| 28/9  |            | 4.486                   | 0.002 | 1.570                   | 0.004 | 9.257                    | 0.005  | 0.744                   | 0.000 | 3.001                    | 0.012 |
| 29/9  |            | 10.120                  | 0.018 | 3.542                   | 0.040 | 22.001                   | 0.080  | 1.886                   | 0.014 | 6.405                    | 0.090 |
| 30/9  |            | 18.267                  | 0.052 | 4.883                   | 0.000 | 25.202                   | 0.038  | 3.838                   | 0.000 | 8.395                    | 0.000 |
| 1/10  |            | 20.495                  | 0.006 | 4.382                   | 0.016 | 23.702                   | 0.034  | 4.433                   | 0.001 | 8.842                    | 0.086 |
| 2/10  |            | 14.771                  | 0.019 | 2.873                   | 0.005 | 16.538                   | 0.032  | 1.587                   | 0.004 | 5.366                    | 0.094 |
| 3/10  |            | 2.703                   | 0.019 | 0.749                   | 0.007 | 6.018                    | 0.006  | 0.463                   | 0.008 | 1.757                    | 0.047 |
| 4/10  |            | 4.316                   | 0.011 | 3.440                   | 0.035 | 9.053                    | 0.021  | 1.248                   | 0.005 | 2.006                    | 0.081 |
| 5/10  |            | 4.249                   | 0.008 | 3.509                   | 0.001 | 10.019                   | 0.028  | 1.689                   | 0.004 | 2.219                    | 0.018 |
| 6/10  |            | 6.610                   | 0.025 | 4.651                   | 0.009 | 15.406                   | 0.021  | 2.283                   | 0.006 | 4.897                    | 0.003 |
| 7/10  |            | 7.975                   | 0.065 | 4.230                   | 0.011 | 12.426                   | 0.046  | 2.822                   | 0.028 | 3.532                    | 0.061 |
| 13/10 | Montorso   | 2.422                   | 0.016 | 1.571                   | 0.008 | 8.610                    | 0.002  | 0.410                   | 0.008 | 1.938                    | 0.004 |
| 14/10 |            | 4.756                   | 0.002 | 2.364                   | 0.087 | 10.131                   | 0.019  | 1.256                   | 0.007 | 3.964                    | 0.060 |
| 15/10 |            | 2.988                   | 0.061 | 1.320                   | 0.032 | 13.057                   | 0.030  | 0.512                   | 0.003 | 5.075                    | 0.149 |
| 16/10 |            | 3.626                   | 0.046 | 0.783                   | 0.003 | 8.986                    | 0.002  | 0.405                   | 0.004 | 3.522                    | 0.023 |
| 17/10 |            | 10.262                  | 0.068 | 1.611                   | 0.002 | 16.026                   | 0.053  | 1.010                   | 0.024 | 4.638                    | 0.003 |
| 18/10 |            | 11.737                  | 0.013 | 1.451                   | 0.015 | 31.261                   | 0.780  | 1.185                   | 0.003 | 3.688                    | 0.010 |
| 19/10 |            | 14.944                  | 0.011 | 2.706                   | 0.012 | 36.749                   | 0.219  | 1.578                   | 0.007 | 6.340                    | 0.030 |
| 20/10 |            | 13.820                  | 0.052 | 5.056                   | 0.012 | 25.155                   | 0.062  | 3.000                   | 0.003 | 9.412                    | 0.054 |
| 21/10 |            | 18.053                  | 0.053 | 4.847                   | 0.003 | 23.72                    | 0.16   | 4.519                   | 0.011 | 9.078                    | 0.052 |
| 22/10 |            | 19.337                  | 0.062 | 4.263                   | 0.003 | 27.23                    | 0.14   | 4.410                   | 0.004 | 7.614                    | 0.048 |
| 23/10 |            | 14.582                  | 0.040 | 3.658                   | 0.063 | 25.952                   | 0.032  | 3.340                   | 0.059 | 7.940                    | 0.017 |
| 24/10 |            | 19.665                  | 0.028 | 2.778                   | 0.023 | 26.877                   | 0.176  | 3.053                   | 0.009 | 5.168                    | 0.011 |
| 25/10 |            | 6.254                   | 0.022 | 1.483                   | 0.009 | 9.253                    | 0.004  | 1.014                   | 0.001 | 3.057                    | 0.015 |
| 26/10 |            | 12.297                  | 0.016 | 2.228                   | 0.001 | 15.927                   | 0.022  | 1.271                   | 0.012 | 5.624                    | 0.008 |
| 27/10 |            | 3.305                   | 0.014 | 0.743                   | 0.004 | 7.143                    | 0.000  | 0.287                   | 0.002 | 2.535                    | 0.010 |
| 28/10 |            | 7.241                   | 0.013 | 1.882                   | 0.001 | 13.071                   | 0.021  | 0.462                   | 0.004 | 5.500                    | 0.023 |
| 30/10 |            | Trissino                | 8.462 | 0.048                   | 1.463 | 0.099                    | 23.216 | 0.002                   | 1.290 | 0.010                    | 3.633 |
| 31/10 | 15.160     |                         | 0.025 | 2.119                   | 0.024 | 26.001                   | 0.011  | 3.031                   | 0.004 | 3.508                    | 0.023 |
| 1/11  | 17.26      |                         | 0.21  | 2.111                   | 0.010 | 28.439                   | 0.053  | 3.592                   | 0.002 | 3.460                    | 0.009 |
| 2/11  | 15.694     |                         | 0.109 | 2.917                   | 0.036 | 26.936                   | 0.080  | 2.357                   | 0.009 | 3.977                    | 0.032 |
| 3/11  | 15.462     |                         | 0.026 | 2.784                   | 0.015 | 26.443                   | 0.034  | 1.793                   | 0.004 | 4.988                    | 0.027 |
| 5/11  | 3.165      |                         | 0.003 | 0.457                   | 0.015 | 16.344                   | 0.019  | 0.288                   | 0.026 | 0.899                    | 0.014 |
| 6/11  | 6.872      |                         | 0.012 | 1.558                   | 0.004 | 16.831                   | 0.025  | 1.105                   | 0.008 | 3.087                    | 0.003 |



|       |          |        |       |       |       |        |       |       |       |       |       |
|-------|----------|--------|-------|-------|-------|--------|-------|-------|-------|-------|-------|
| 7/11  | Trissino | 6.124  | 0.002 | 1.417 | 0.005 | 13.033 | 0.012 | 1.578 | 0.007 | 2.357 | 0.001 |
| 8/11  |          | 6.962  | 0.053 | 1.120 | 0.007 | 25.823 | 0.002 | 1.682 | 0.007 | 3.447 | 0.051 |
| 9/11  |          | 10.361 | 0.031 | 1.815 | 0.010 | 35.623 | 0.119 | 2.433 | 0.019 | 6.059 | 0.031 |
| 10/11 |          | 8.953  | 0.015 | 1.694 | 0.009 | 33.630 | 0.051 | 2.120 | 0.004 | 4.919 | 0.057 |
| 11/11 |          | 5.944  | 0.009 | 1.418 | 0.002 | 21.316 | 0.023 | 0.671 | 0.009 | 3.211 | 0.027 |
| 12/11 |          | 9.670  | 0.006 | 2.130 | 0.001 | 34.460 | 0.030 | 2.549 | 0.002 | 6.400 | 0.044 |
| 13/11 |          | 18.226 | 0.048 | 3.147 | 0.003 | 35.848 | 0.088 | 5.036 | 0.012 | 7.568 | 0.014 |
| 14/11 |          | 13.188 | 0.023 | 2.453 | 0.007 | 24.486 | 0.017 | 2.411 | 0.008 | 3.890 | 0.008 |
| 15/11 |          | 18.409 | 0.011 | 3.416 | 0.009 | 28.152 | 0.040 | 3.304 | 0.024 | 3.699 | 0.016 |
| 16/11 |          | 16.390 | 0.007 | 2.331 | 0.007 | 24.147 | 0.049 | 1.878 | 0.005 | 4.375 | 0.046 |
| 17/11 |          | 3.648  | 0.011 | 1.209 | 0.001 | 11.413 | 0.010 | 0.566 | 0.000 | 3.730 | 0.032 |
| 18/11 |          | 8.510  | 0.038 | 1.528 | 0.001 | 21.694 | 0.030 | 1.443 | 0.006 | 3.557 | 0.028 |

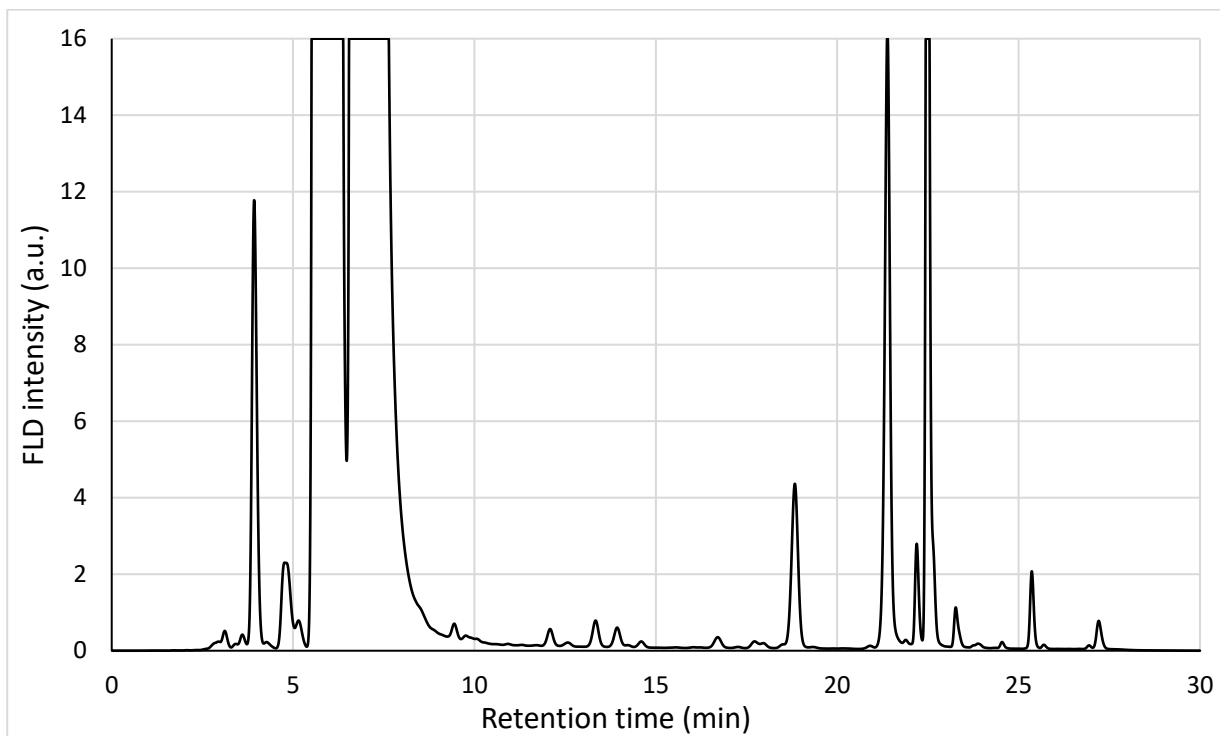

**Figure S1** UHPLC-FLD chromatogram of a blank sample.

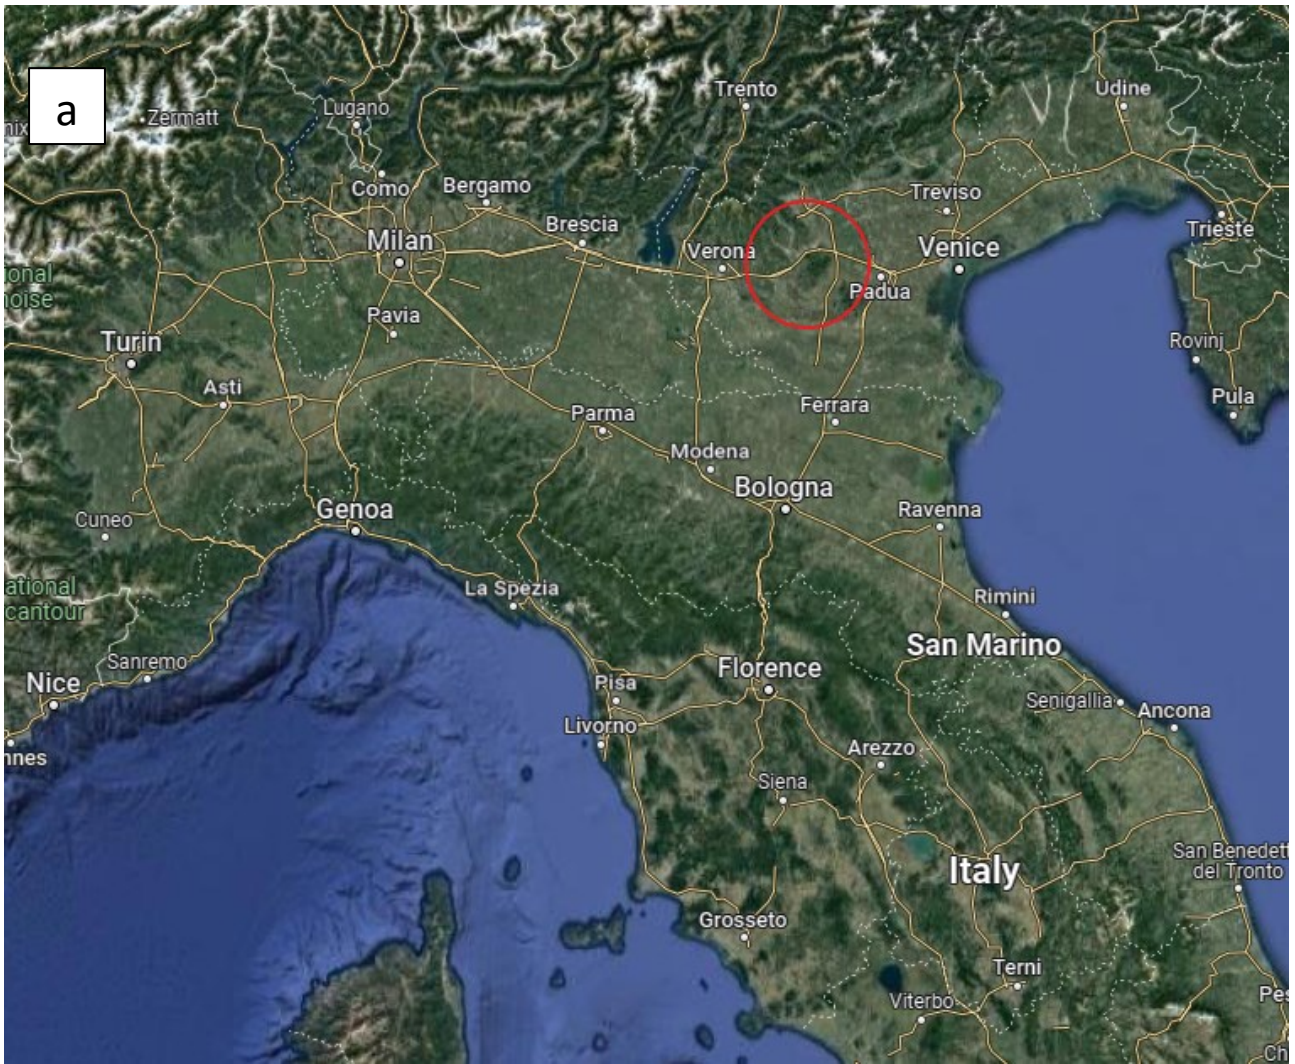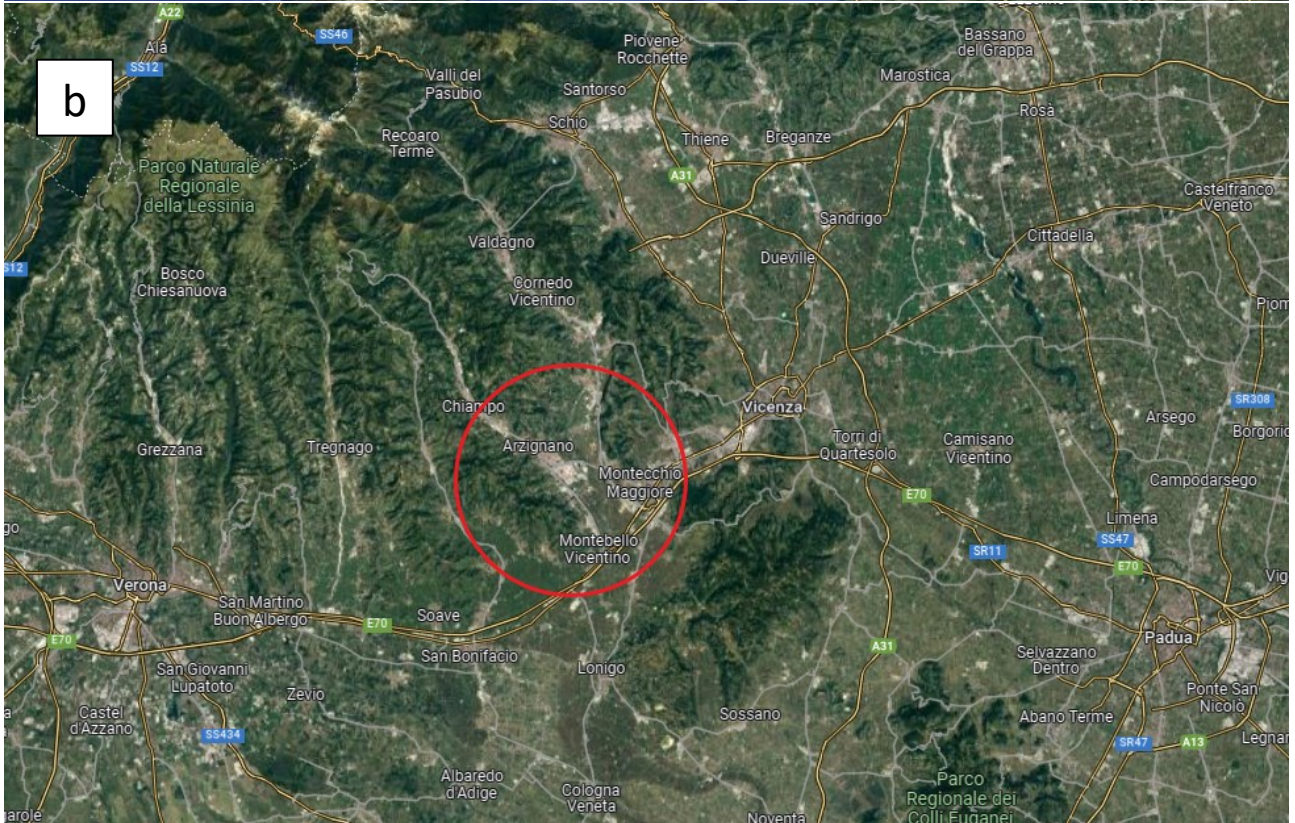

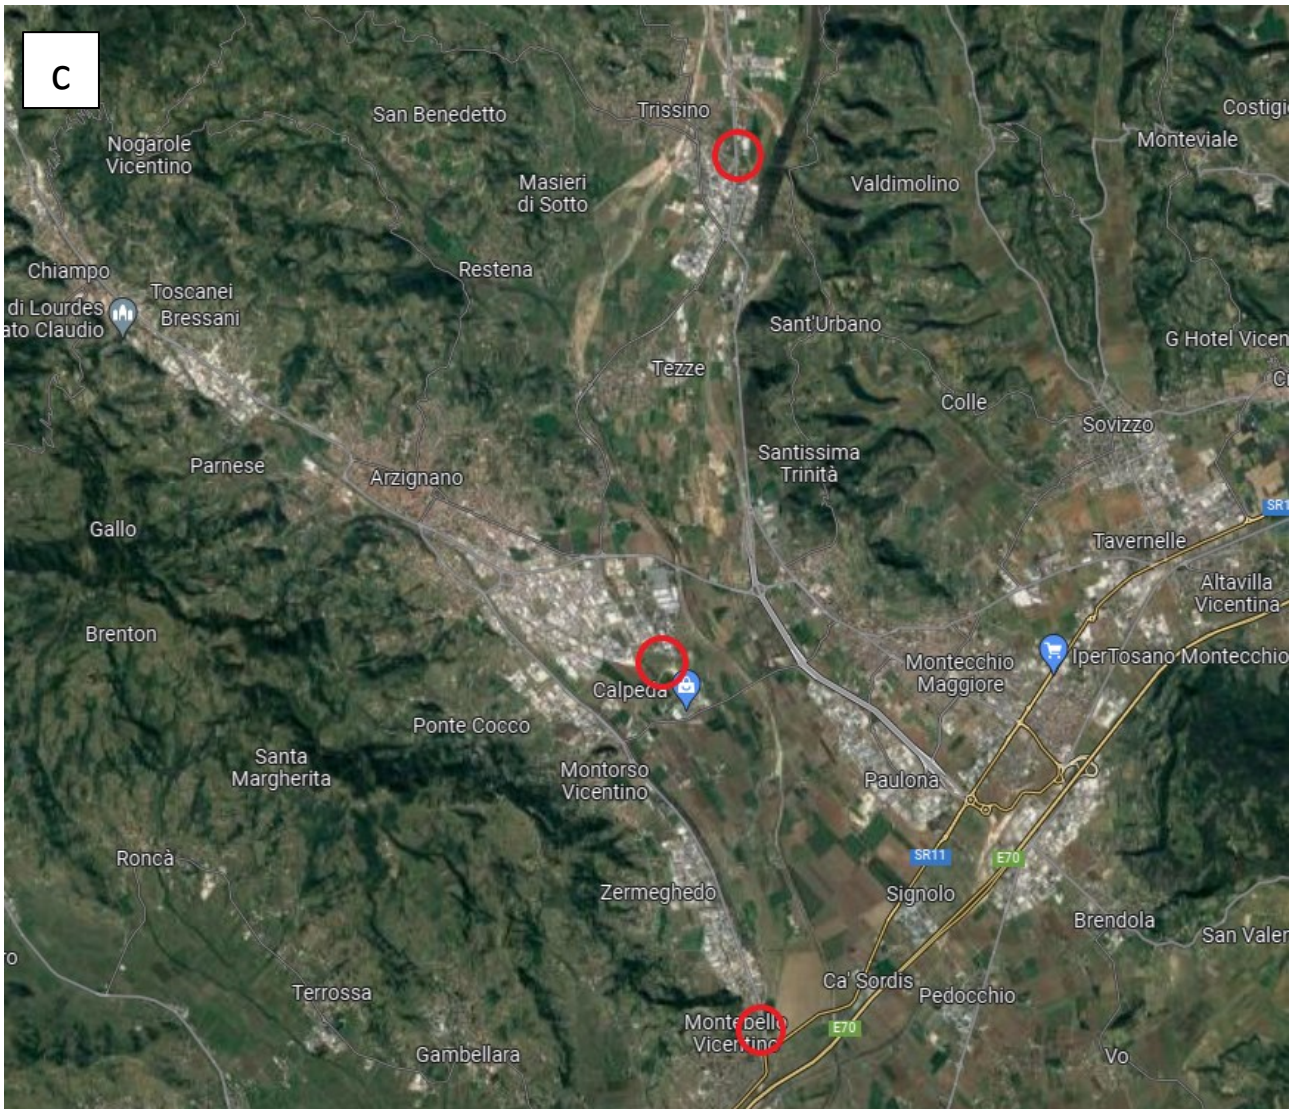

**Figure S2** (a) Map of northern Italy; (b) Map of the province of Vicenza; (c) Map of the industrial area of the Chiampo Valley. The red circles indicate the three sampling sites. Images from “[Google Maps](https://www.google.com/maps/)” in accordance with the Fair Use guidelines for publications (<https://about.google/brand-resource-center/products-and-services/geo-guidelines/>).

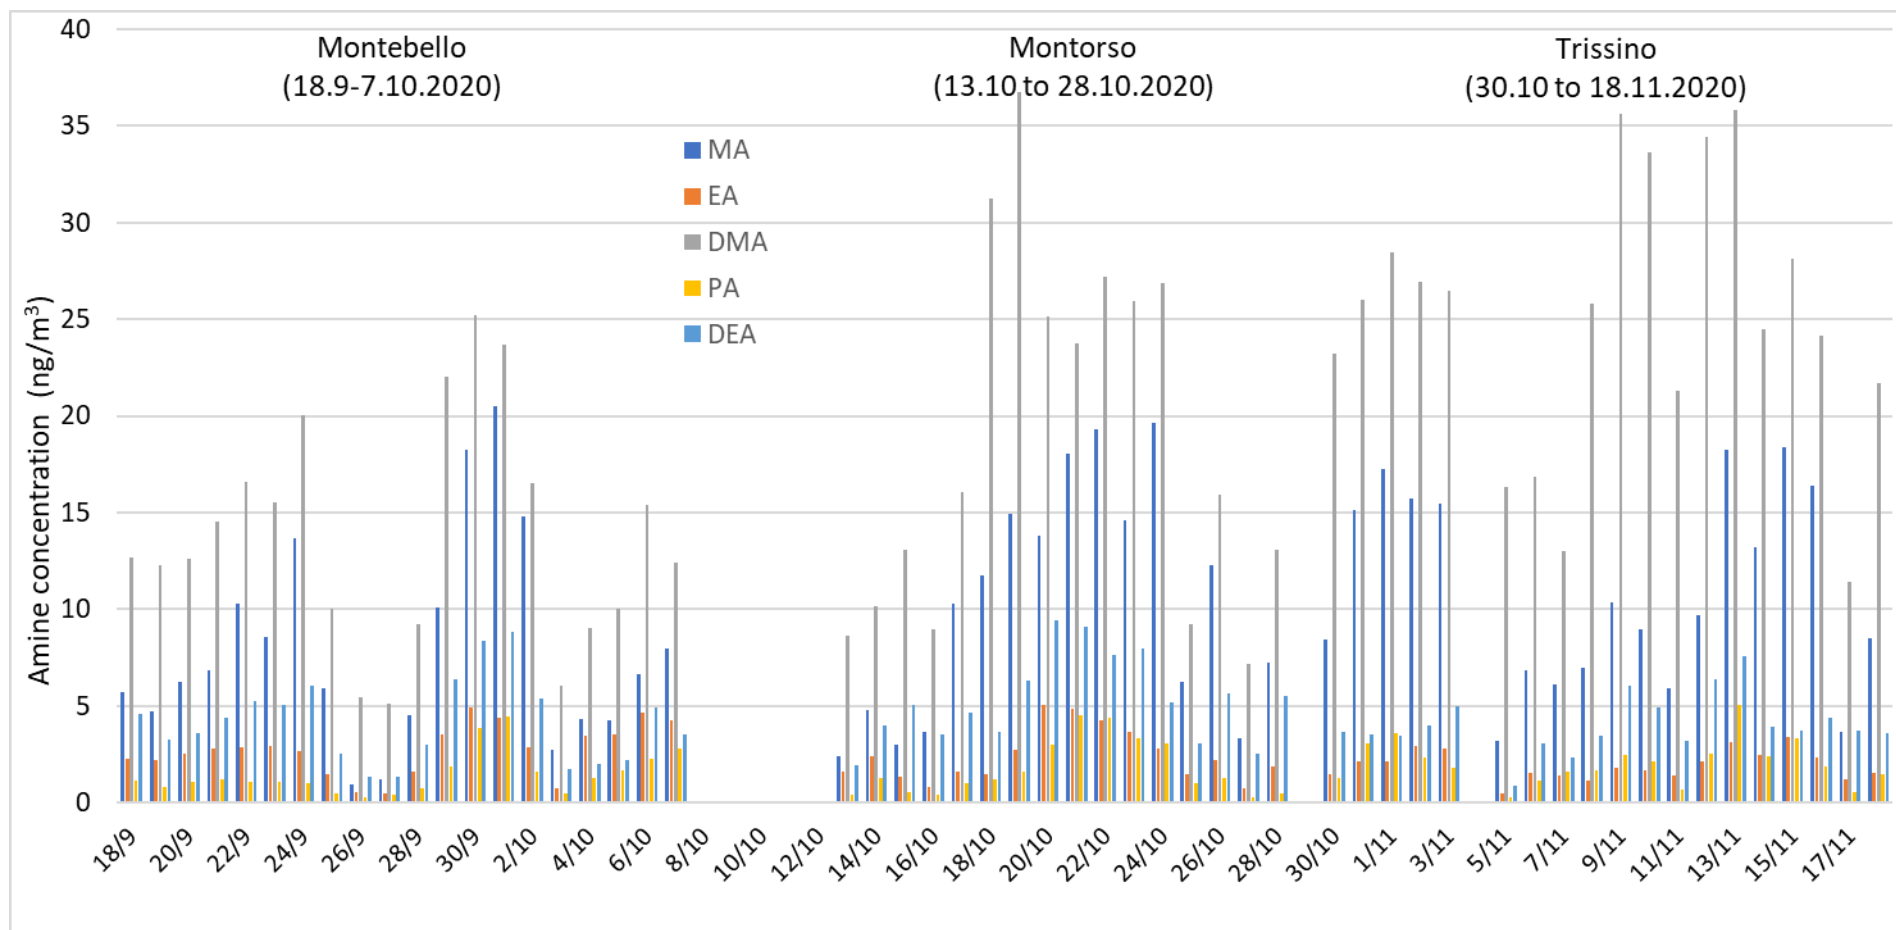

**Figure S3:** Amine concentrations during the sampling campaign in the three different sites (Montebello, Montorso, Trissino).

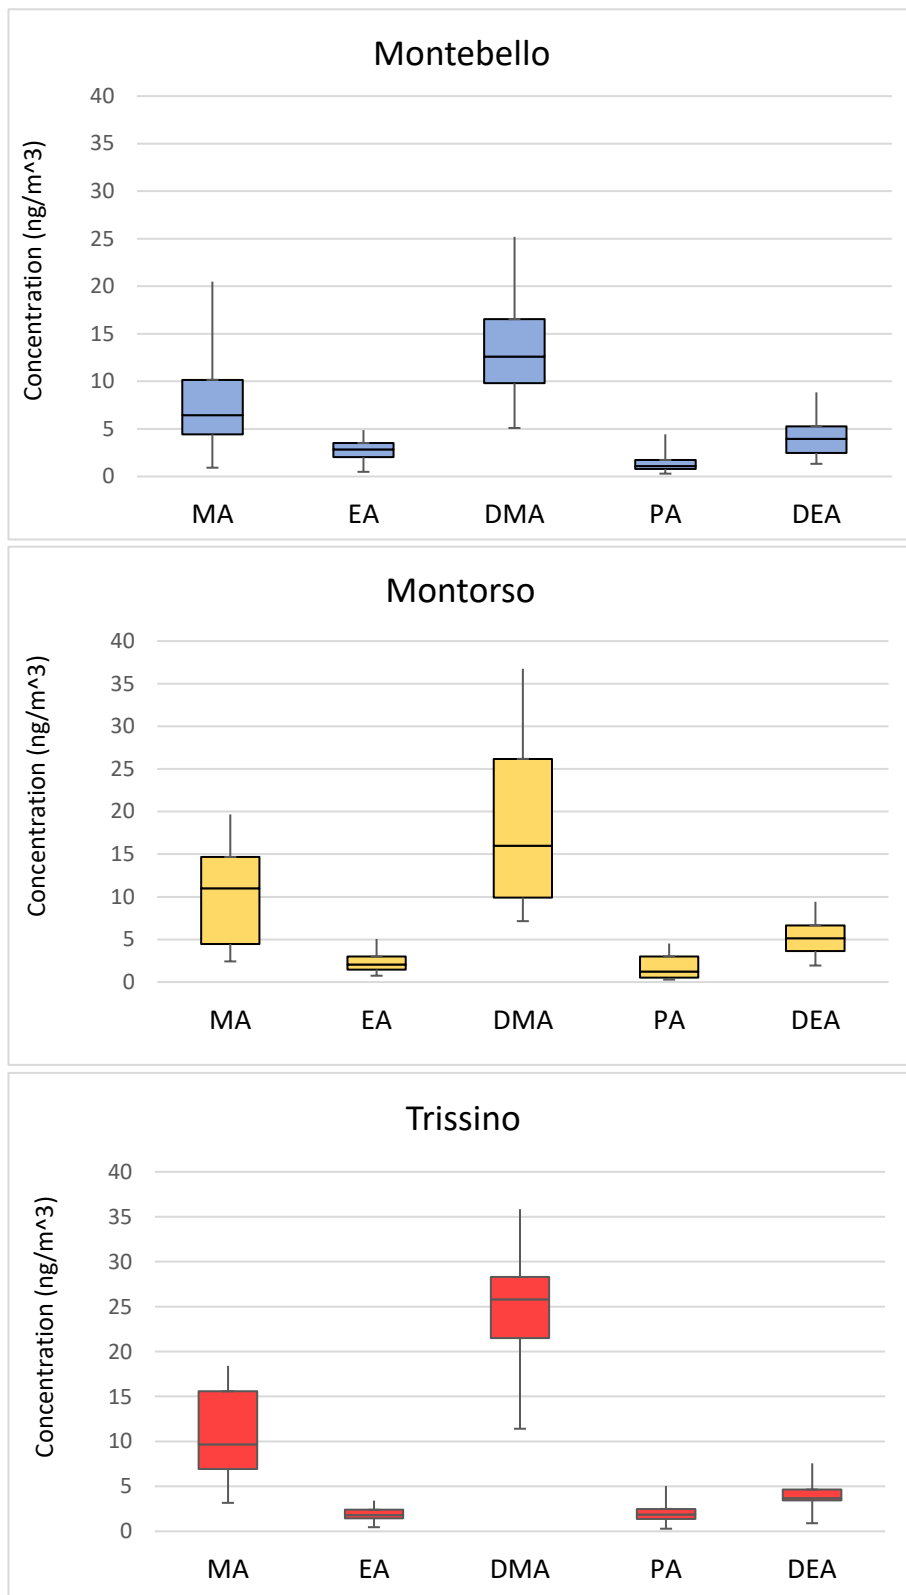

**Figure S4:** Box-plot of amines concentrations in the sites of Montebello, Montorso e Trissino.

**Table S5:** Comparison of amines signals (UHPLC-FLD) of solutions obtained from a real PM10 sample (two halves of the same filter) extracted with different extraction times.

| Sample | Extraction time (minutes) | MA (area) | DMA (area) | EA (area) | PA (area) | DEA (area) |
|--------|---------------------------|-----------|------------|-----------|-----------|------------|
| 1      | 10                        | 10543111  | 11680168   | 2032522   | 893767    | 2920727    |
| 2      | 20                        | 11358177  | 12326303   | 1915332   | 904079    | 2880272    |

**Table S6:** Comparison of amines signals (UHPLC-FLD) of a real PM10 extract derivatized using different reaction temperatures or times.

| Sample | T (°C) | Reaction time (minutes) | MA (area) | EA* (area) | DMA (area) | PA (area) | DEA (area) |
|--------|--------|-------------------------|-----------|------------|------------|-----------|------------|
| 1      | 25     | 20                      | 6974869   | 16058949   | 8248452    | 437072    | 1382010    |
| 2      | 50     | 5                       | 7268735   | 32517224   | 8727659    | 367248    | 1417684    |
| 3      | 50     | 10                      | 7174802   | 1470186    | 8978536    | 416980    | 1365358    |
| 4      | 50     | 15                      | 7038745   | 1455189    | 8892331    | 419176    | 1357084    |

\* The higher EA signals observed for sample 1 and 2 are due to the interfering unreacted Fmoc.

**Table S7** Comparison between the results obtained with FLD and MS analysis of the solutions extracted from three different samples of PM10.

|                                                                                  |         | sample 1 |       | sample 2 |       | sample 3 |       |
|----------------------------------------------------------------------------------|---------|----------|-------|----------|-------|----------|-------|
|                                                                                  |         | FLD      | Q-TOF | FLD      | Q-TOF | FLD      | Q-TOF |
| <b>MA (µg/L)</b><br>Quantitation ion:<br>179.0861<br>Qualifier ion:<br>254.1175  | Conc.   | 81.05    | 83.94 | 81.42    | 82.55 | 74.88    | 79.92 |
|                                                                                  | Dev Std | 1.09     | 1.82  | 0.22     | 1.67  | 0.57     | 0.68  |
|                                                                                  | P-value | 0.078    |       | 0.36     |       | 0.0006   |       |
| <b>EA (µg/L)</b><br>Quantitation ion:<br>179.0861<br>Qualifier ion:<br>268.1332  | Conc.   | 72.30    | 71.23 | 64.70    | 59.87 | 62.00    | 62.09 |
|                                                                                  | Dev Std | 0.32     | 0.11  | 0.08     | 4.57  | 0.42     | 1.38  |
|                                                                                  | P-value | 0.005    |       | 0.21     |       | 0.92     |       |
| <b>DMA (µg/L)</b><br>Quantitation ion:<br>179.0861<br>Qualifier ion:<br>268.1332 | Conc.   | 85.59    | 84.40 | 86.92    | 85.50 | 83.43    | 84.26 |
|                                                                                  | Dev Std | 0.10     | 1.44  | 0.40     | 0.22  | 0.13     | 0.24  |
|                                                                                  | P-value | 0.29     |       | 0.006    |       | 0.006    |       |
| <b>PA (µg/L)</b><br>Quantitation ion:<br>179.0861<br>Qualifier ion:<br>282.1488  | Conc.   | 67.01    | 65.56 | 63.31    | 62.66 | 61.14    | 60.88 |
|                                                                                  | Dev Std | 0.47     | 1.22  | 0.05     | 0.71  | 0.33     | 0.54  |
|                                                                                  | P-value | 0.13     |       | 0.26     |       | 0.51     |       |
| <b>DEA (µg/L)</b><br>Quantitation ion:<br>179.0861<br>Qualifier ion:<br>296.1645 | Conc.)  | 77.04    | 77.98 | 69.94    | 70.50 | 72.01    | 72.23 |
|                                                                                  | Dev Std | 0.41     | 1.24  | 0.78     | 0.85  | 0.20     | 0.38  |
|                                                                                  | P-value | 0.28     |       | 0.45     |       | 0.42     |       |



**Table S8** Comparison of amine concentration in different urbanized sites.

| Reference       | Akyüz, 2008        |             |             |             | Cheng et al., 2020    |              |             | Feng et al., 2020  | Choi et al., 2020  | This study            |
|-----------------|--------------------|-------------|-------------|-------------|-----------------------|--------------|-------------|--------------------|--------------------|-----------------------|
| Location        | Zonguldak, Turkey  |             |             |             | Yangzhou, China       |              |             | Shanghai, China    | Seoul, Korea       | Vicenza, Italy        |
| Characteristics | Industrial area    |             |             |             | Urban area            |              |             | Urban site         | Urban site         | Industrial area       |
| Period          | 2006-2007          |             |             |             | 2016/04/06-2016/11/02 |              |             | 2018/10-2018/11    | 2018/01-2018/12    | 2020/09/18-2020/11/18 |
| Season          | winter             |             | summer      |             | spring                | summer       | autumn      | \                  | \                  | \                     |
| PM              | PM10               | PM2.5       | PM10        | PM2.5       | PM2.5                 |              |             | PM2.5              | PM2.5              | PM10                  |
| Unit            | ng m <sup>-3</sup> |             |             |             | ng m <sup>-3</sup>    |              |             | ng m <sup>-3</sup> | ng m <sup>-3</sup> | ng m <sup>-3</sup>    |
| MA              | 7.13 ± 3.17        | 4.48 ± 1.75 | 3.93 ± 2.41 | 2.33 ± 1.30 | 1.65 ± 1.88           | 1.41 ± 1.30  | 1.24 ± 0.74 | 19.8 ± 15.9        | \                  | 9.7 ± 5.5             |
| EA              | 6.87 ± 3.51        | 4.37 ± 2.27 | 3.82 ± 1.89 | 2.19 ± 1.13 | 20.04 ± 13.79         | 14.25 ± 7.43 | 3.02 ± 1.81 | \                  | 0.27 ± 0.97        | 2.4 ± 1.2             |
| DMA             | 6.84 ± 3.20        | 4.58 ± 2.28 | 4.58 ± 2.45 | 2.79 ± 1.55 | 4.04 ± 4.35           | 3.99 ± 4.36  | 2.56 ± 2.29 | 18.7 ± 13.4        | 2.72 ± 1.49        | 19.0 ± 8.7            |
| PA              | 8.58 ± 3.54        | 5.66 ± 2.20 | 4.74 ± 3.10 | 2.98 ± 2.19 | \                     | \            | \           | \                  | 0.43 ± 0.79        | 1.8 ± 1.2             |
| BA              | 9.46 ± 3.66        | 6.65 ± 2.37 | 6.14 ± 5.10 | 4.24 ± 3.59 | \                     | \            | \           | \                  | 0.83 ± 1.08        | \                     |
| DEA             | 6.20 ± 2.93        | 4.11 ± 1.75 | 4.34 ± 2.41 | 2.82 ± 1.76 | \                     | \            | \           | \                  | 1.31 ± 0.49        | 4.5 ± 2.0             |

**Table S9** Pearson's correlation matrix of all the considered variables.

|      | PM10  | OC    | EC    | Na    | NH4   | K     | Mg    | Ca    | Cl    | NO3   | SO4   | MA    | EA    | DMA   | PA    | DEA   | T     | U     | H2S   | NO    | NO2   | NOx   | NH3   | Rain  |
|------|-------|-------|-------|-------|-------|-------|-------|-------|-------|-------|-------|-------|-------|-------|-------|-------|-------|-------|-------|-------|-------|-------|-------|-------|
| PM10 | 1,00  | 0,90  | 0,36  | -0,13 | 0,87  | 0,62  | 0,44  | 0,46  | 0,56  | 0,88  | 0,68  | 0,77  | 0,38  | 0,80  | 0,68  | 0,55  | -0,45 | 0,44  | -0,06 | -0,01 | -0,09 | -0,04 | -0,22 | -0,22 |
| OC   | 0,90  | 1,00  | 0,37  | -0,08 | 0,71  | 0,70  | 0,54  | 0,58  | 0,65  | 0,72  | 0,64  | 0,61  | 0,14  | 0,80  | 0,52  | 0,37  | -0,53 | 0,36  | 0,14  | -0,03 | -0,13 | -0,07 | -0,35 | -0,26 |
| EC   | 0,36  | 0,37  | 1,00  | -0,30 | 0,26  | 0,45  | -0,03 | 0,29  | -0,05 | 0,29  | 0,28  | 0,38  | 0,27  | 0,50  | 0,43  | 0,38  | -0,23 | 0,06  | 0,42  | 0,63  | 0,51  | 0,64  | -0,05 | -0,26 |
| Na   | -0,13 | -0,08 | -0,30 | 1,00  | -0,24 | -0,21 | 0,60  | 0,29  | 0,52  | -0,22 | 0,06  | -0,21 | 0,03  | -0,15 | -0,13 | -0,19 | 0,23  | -0,18 | -0,05 | -0,08 | -0,24 | -0,14 | 0,18  | -0,10 |
| NH4  | 0,87  | 0,71  | 0,26  | -0,24 | 1,00  | 0,51  | 0,15  | 0,15  | 0,29  | 0,99  | 0,69  | 0,84  | 0,51  | 0,69  | 0,78  | 0,67  | -0,38 | 0,49  | -0,13 | -0,05 | -0,10 | -0,07 | -0,11 | -0,14 |
| K    | 0,62  | 0,70  | 0,45  | -0,21 | 0,51  | 1,00  | 0,09  | 0,15  | 0,30  | 0,57  | 0,42  | 0,61  | 0,04  | 0,73  | 0,53  | 0,16  | -0,62 | 0,43  | 0,34  | -0,01 | -0,05 | -0,03 | -0,24 | -0,20 |
| Mg   | 0,44  | 0,54  | -0,03 | 0,60  | 0,15  | 0,09  | 1,00  | 0,83  | 0,89  | 0,18  | 0,38  | 0,17  | 0,09  | 0,35  | 0,05  | 0,12  | 0,00  | 0,01  | -0,10 | -0,03 | -0,19 | -0,10 | -0,07 | -0,12 |
| Ca   | 0,46  | 0,58  | 0,29  | 0,29  | 0,15  | 0,15  | 0,83  | 1,00  | 0,66  | 0,17  | 0,49  | 0,19  | 0,13  | 0,51  | 0,14  | 0,30  | 0,00  | -0,19 | 0,10  | 0,16  | 0,14  | 0,16  | -0,05 | -0,20 |
| Cl   | 0,56  | 0,65  | -0,05 | 0,52  | 0,29  | 0,30  | 0,89  | 0,66  | 1,00  | 0,31  | 0,37  | 0,26  | -0,01 | 0,45  | 0,13  | 0,03  | -0,29 | 0,31  | -0,04 | -0,10 | -0,32 | -0,20 | -0,29 | -0,15 |
| NO3  | 0,88  | 0,72  | 0,29  | -0,22 | 0,99  | 0,57  | 0,18  | 0,17  | 0,31  | 1,00  | 0,65  | 0,86  | 0,52  | 0,72  | 0,82  | 0,67  | -0,42 | 0,50  | -0,10 | 0,00  | -0,08 | -0,03 | -0,12 | -0,14 |
| SO4  | 0,68  | 0,64  | 0,28  | 0,06  | 0,69  | 0,42  | 0,38  | 0,49  | 0,37  | 0,65  | 1,00  | 0,63  | 0,41  | 0,62  | 0,54  | 0,49  | 0,06  | 0,07  | -0,07 | -0,13 | -0,07 | -0,13 | 0,14  | -0,16 |
| MA   | 0,77  | 0,61  | 0,38  | -0,21 | 0,84  | 0,61  | 0,17  | 0,19  | 0,26  | 0,86  | 0,63  | 1,00  | 0,59  | 0,74  | 0,82  | 0,68  | -0,22 | 0,47  | -0,15 | 0,03  | -0,03 | 0,01  | 0,06  | -0,08 |
| EA   | 0,38  | 0,14  | 0,27  | 0,03  | 0,51  | 0,04  | 0,09  | 0,13  | -0,01 | 0,52  | 0,41  | 0,59  | 1,00  | 0,30  | 0,71  | 0,68  | 0,19  | -0,01 | -0,33 | 0,26  | 0,07  | 0,23  | 0,25  | -0,10 |
| DMA  | 0,80  | 0,80  | 0,50  | -0,15 | 0,69  | 0,73  | 0,35  | 0,51  | 0,45  | 0,72  | 0,62  | 0,74  | 0,30  | 1,00  | 0,66  | 0,56  | -0,47 | 0,39  | 0,27  | 0,09  | 0,10  | 0,09  | -0,22 | -0,13 |
| PA   | 0,68  | 0,52  | 0,43  | -0,13 | 0,78  | 0,53  | 0,05  | 0,14  | 0,13  | 0,82  | 0,54  | 0,82  | 0,71  | 0,66  | 1,00  | 0,66  | -0,26 | 0,28  | -0,01 | 0,24  | 0,11  | 0,22  | 0,09  | -0,22 |
| DEA  | 0,55  | 0,37  | 0,38  | -0,19 | 0,67  | 0,16  | 0,12  | 0,30  | 0,03  | 0,67  | 0,49  | 0,68  | 0,68  | 0,56  | 0,66  | 1,00  | -0,06 | 0,20  | -0,22 | 0,30  | 0,35  | 0,34  | 0,17  | 0,08  |
| T    | -0,45 | -0,53 | -0,23 | 0,23  | -0,38 | -0,62 | 0,00  | 0,00  | -0,29 | -0,42 | 0,06  | -0,22 | 0,19  | -0,47 | -0,26 | -0,06 | 1,00  | -0,63 | -0,38 | -0,13 | -0,06 | -0,12 | 0,58  | 0,06  |
| U    | 0,44  | 0,36  | 0,06  | -0,18 | 0,49  | 0,43  | 0,01  | -0,19 | 0,31  | 0,50  | 0,07  | 0,47  | -0,01 | 0,39  | 0,28  | 0,20  | -0,63 | 1,00  | -0,03 | -0,05 | -0,08 | -0,06 | -0,32 | 0,24  |
| H2S  | -0,06 | 0,14  | 0,42  | -0,05 | -0,13 | 0,34  | -0,10 | 0,10  | -0,04 | -0,10 | -0,07 | -0,15 | -0,33 | 0,27  | -0,01 | -0,22 | -0,38 | -0,03 | 1,00  | 0,08  | 0,21  | 0,12  | -0,27 | -0,19 |
| NO   | -0,01 | -0,03 | 0,63  | -0,08 | -0,05 | -0,01 | -0,03 | 0,16  | -0,10 | 0,00  | -0,13 | 0,03  | 0,26  | 0,09  | 0,24  | 0,30  | -0,13 | -0,05 | 0,08  | 1,00  | 0,66  | 0,96  | 0,07  | -0,07 |
| NO2  | -0,09 | -0,13 | 0,51  | -0,24 | -0,10 | -0,05 | -0,19 | 0,14  | -0,32 | -0,08 | -0,07 | -0,03 | 0,07  | 0,10  | 0,11  | 0,35  | -0,06 | -0,08 | 0,21  | 0,66  | 1,00  | 0,84  | 0,34  | 0,32  |
| Nox  | -0,04 | -0,07 | 0,64  | -0,14 | -0,07 | -0,03 | -0,10 | 0,16  | -0,20 | -0,03 | -0,13 | 0,01  | 0,23  | 0,09  | 0,22  | 0,34  | -0,12 | -0,06 | 0,12  | 0,96  | 0,84  | 1,00  | 0,18  | 0,07  |
| NH3  | -0,22 | -0,35 | -0,05 | 0,18  | -0,11 | -0,24 | -0,07 | -0,05 | -0,29 | -0,12 | 0,14  | 0,06  | 0,25  | -0,22 | 0,09  | 0,17  | 0,58  | -0,32 | -0,27 | 0,07  | 0,34  | 0,18  | 1,00  | 0,07  |
| Rain | -0,22 | -0,26 | -0,26 | -0,10 | -0,14 | -0,20 | -0,12 | -0,20 | -0,15 | -0,14 | -0,16 | -0,08 | -0,10 | -0,13 | -0,22 | 0,08  | 0,06  | 0,24  | -0,19 | -0,07 | 0,32  | 0,07  | 0,07  | 1,00  |

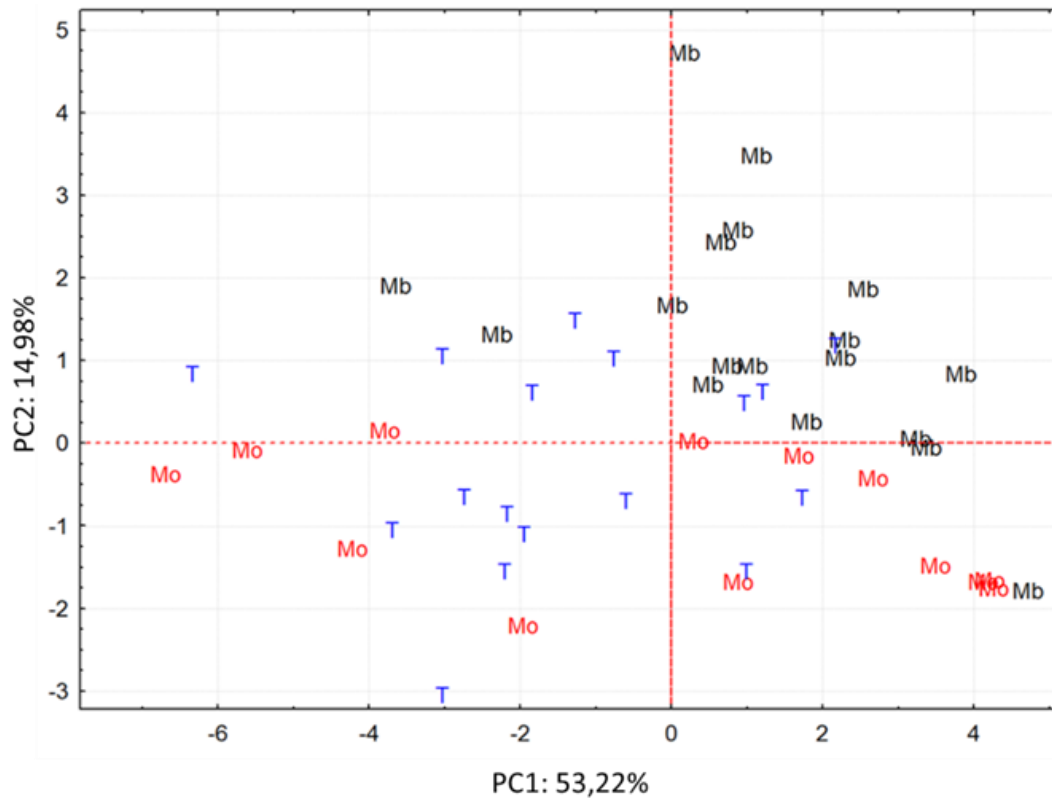

**Figure S5** Score plot (PCA), Mb corresponds to Montebello, Mo to Montorso and T to Trissino.
